# Supplementary material for: In search of potential predictors of erythropoiesis-stimulating agents (ESAs) hyporesponsiveness: a population-based study
Source: PubMed Central journal article supplement (PMC6744676; doi:10.1186/s12882-019-1554-0), 2019-09-14

**Additional file 3.** ROC curve to predict the discriminant power of non-responsiveness in CKD

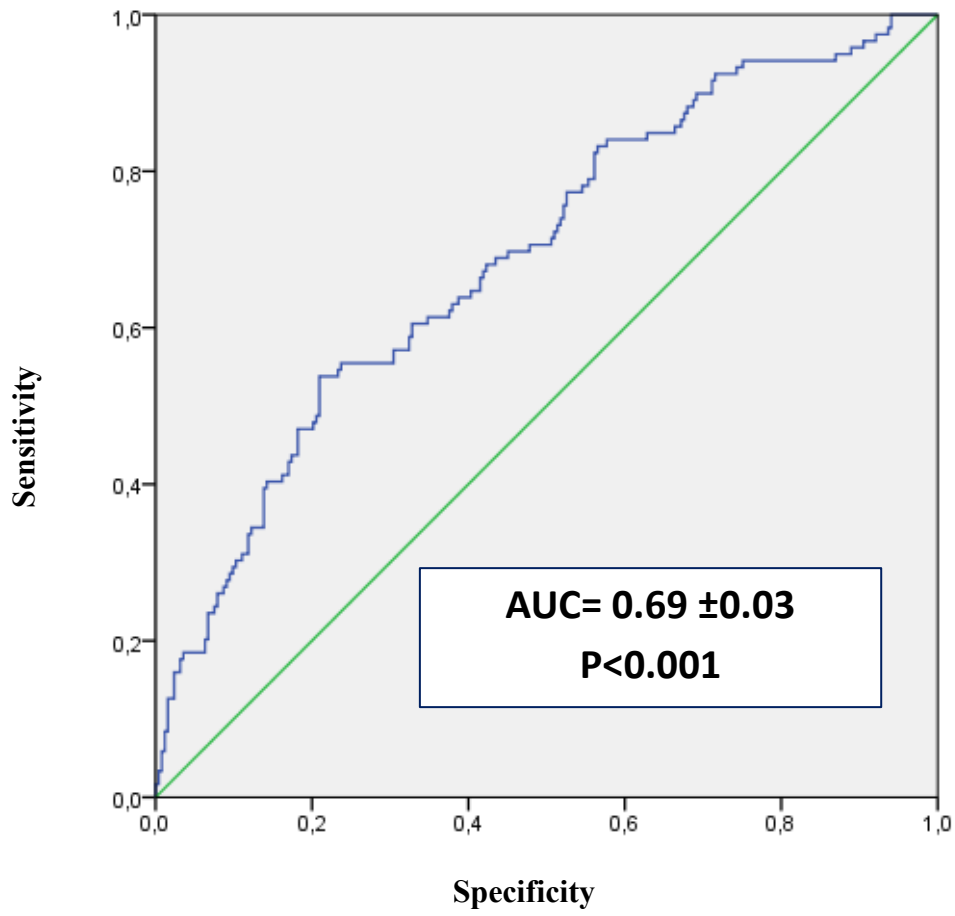

Supplement: 12882_2019_1554_MOESM3_ESM.pdf [file 12882_2019_1554_MOESM3_ESM.pdf]
