# Supplementary material for: In search of potential predictors of erythropoiesis-stimulating agents (ESAs) hyporesponsiveness: a population-based study
Source: BMC Nephrol. 2019 Sep 14;20:359. doi: 10.1186/s12882-019-1554-0 (PMC6744676; doi:10.1186/s12882-019-1554-0)
Supplement: Supplementary file 2 — Additional file 2. Multivariate binary logistic regression to evaluate non responsiveness to ESAs between the 2nd and the 6th month after ID in CKD patients. [file 12882_2019_1554_MOESM2_ESM.pdf]

**Additional file 2.** Multivariate binary logistic regression to evaluate non responsiveness to ESAs between the 2<sup>nd</sup> and the 6<sup>th</sup> month after ID in CKD patients

|                                 | <b>Non responsiveness</b><br><b>(Hb&lt;11g/dL)</b><br><b>N=147</b> |                |
|---------------------------------|--------------------------------------------------------------------|----------------|
|                                 | <b>OR (95% CI)</b>                                                 | <b>P-value</b> |
| <b>Age (1 year)</b>             | 1.0 (1.0-1.1)                                                      | 0.161          |
| <b>Sex (Males)</b>              | <b>0.5 (0.3-0.9)</b>                                               | <b>0.011</b>   |
| <b>Baseline Hb - g/dL</b>       | <b>0.7 (0.5-1.0)</b>                                               | <b>0.053</b>   |
| <b>ESA type</b>                 |                                                                    |                |
| <b>Reference product</b>        | <b>Reference</b>                                                   |                |
| Biosimilar                      | 1.7 (0.8-3.5)                                                      | 0.142          |
| Other ESAs covered by patent    | 1.4 (0.7-2.8)                                                      | 0.392          |
| <b>Comorbidities</b>            |                                                                    |                |
| Diabetes mellitus               | 1.4 (0.8-2.2)                                                      | 0.188          |
| Heart failure                   | 1.4 (0.8-2.4)                                                      | 0.236          |
| <b>Concomitant drugs</b>        |                                                                    |                |
| Iron preparations               | <b>0.4 (0.2-0.8)</b>                                               | <b>0.008</b>   |
| High dosage ACE inhibitors/ARBs | 1.0 (0.6-1.8)                                                      | 0.931          |
| <b>Laboratory values</b>        |                                                                    |                |
| Albumin (g/dL)                  | 0.9 (0.6-1.3)                                                      | 0.503          |
| Creatinine (mg/dL)              | 1.0 (0.9-1.1)                                                      | 0.783          |
| Acidosis                        | <b>0.6 (0.3-0.9)</b>                                               | <b>0.037</b>   |

CKD ESA users with at least two consecutive Hb values  $\geq 11$  g/dL registered between the 2<sup>nd</sup> and the 6<sup>th</sup> month after ID were considered ESA responders
