# Supplementary material for: In search of potential predictors of erythropoiesis-stimulating agents (ESAs) hyporesponsiveness: a population-based study
Source: BMC Nephrol. 2019 Sep 14;20:359. doi: 10.1186/s12882-019-1554-0 (PMC6744676; doi:10.1186/s12882-019-1554-0)
Supplement: Supplementary file 4 — Additional file 4. Multivariate binary logistic regression to evaluate non responsiveness to ESAs between the 2nd and the 6th month after ID in cancer patients. [file 12882_2019_1554_MOESM4_ESM.pdf]

**Additional file 4.** Multivariate binary logistic regression to evaluate non responsiveness to ESAs between the 2<sup>nd</sup> and the 6<sup>th</sup> month after ID in cancer patients

|                                 | <b>Non responsiveness</b><br><b>(Hb&lt;11g/dL)</b><br><b>N=135</b> |                |
|---------------------------------|--------------------------------------------------------------------|----------------|
|                                 | <b>OR (95% CI)</b>                                                 | <b>P-value</b> |
| <b>Baseline Hb - g/dL</b>       | <b>0.5 (0.3-0.8)</b>                                               | <b>0.003</b>   |
| <b>Acidosis</b>                 | 0.6 (0.3-1.1)                                                      | 0.109          |
| <b>Concomitant drugs</b>        |                                                                    |                |
| High dosage ACE inhibitors/ARBs | 1.6 (0.5-5.0)                                                      | 0.391          |
| <b>Laboratory values</b>        |                                                                    |                |
| Albumin (g/dL)                  | 1.0 (0.6-1.6)                                                      | 0.907          |
| Ferritin (mcg/L)                | 1.0 (1.0-1.1)                                                      | 0.233          |

Cancer ESA users with at least two consecutive Hb values  $\geq 11$  g/dL registered between the 2<sup>nd</sup> and the 6<sup>th</sup> month after ID were considered ESA responders

Vitamin B<sub>12</sub> covariates were excluded because of the high proportion of missing values (>70%)
